# Supplementary material for: Efficacy and safety of neoadjuvant stereotactic body radiation therapy plus dalpiciclib and exemestane for hormone receptor-positive, HER2-negative breast cancer: A prospective pilot study
Source: eLife. 2025 Jul 28;14:RP101583. doi: 10.7554/eLife.101583 (PMC12303570; doi:10.7554/eLife.101583)
Supplement: Figure 1—source data 1. [file elife-101583-fig1-data1.xlsx]

## Sheet: Figure 1
Sample	Change From Baseline	RECIST	Group	RECIST group
1	-26.9	SD	experimental group	3
2	-31.8	PR	experimental group	2
3	-32.1	PR	experimental group	2
4	-32.3	PR	experimental group	2
5	-34.6	PR	experimental group	2
6	-51	PR	experimental group	2
7	-56.1	PR	experimental group	2
8	-59	PR	experimental group	2
9	-68.1	PR	experimental group	2
10	-76.2	PR	experimental group	2
11	-100	CR	experimental group	1
12	-100	CR	experimental group	1
