# Supplementary material for: Efficacy and safety of neoadjuvant stereotactic body radiation therapy plus dalpiciclib and exemestane for hormone receptor-positive, HER2-negative breast cancer: A prospective pilot study
Source: eLife. 2025 Jul 28;14:RP101583. doi: 10.7554/eLife.101583 (PMC12303570; doi:10.7554/eLife.101583)
Supplement: Figure 2—source data 1. [file elife-101583-fig2-data1.xlsx]

## Sheet: Sheet1
Fig 2. Mean change from baseline in QLQ-C30 over time.
(A) Global health status. (B-F) Physical, role, emotional, cognitive and social functioning.
		Global health status	Physical functioning	Role functioning	Emotional functioning	Cognitive functioning	Social functioning
baseline		84.3608	97.2222	94.4444	84.7222	93.0556	86.1111
cycle 1		82.6392	93.8889	87.5	83.3333	87.5	86.1111
cycle 2		79.1658	94.4444	90.2778	79.1667	84.7222	84.7222
cycle 3		79.1667	93.8889	93.0556	83.3333	88.8889	83.3333
cycle 4		77.4983	93.8889	91.6667	83.3333	84.7222	81.9444
cycle 5		83.3317	93.3333	93.0556	84.0278	91.6667	84.7222
cycle 6		80.5533	90.5556	91.6667	78.4722	87.5	86.1111
before surgery		81.9433	90.5556	90.2778	79.8611	86.1111	81.9444
