# Supplementary material for: Efficacy and safety of neoadjuvant stereotactic body radiation therapy plus dalpiciclib and exemestane for hormone receptor-positive, HER2-negative breast cancer: A prospective pilot study
Source: eLife. 2025 Jul 28;14:RP101583. doi: 10.7554/eLife.101583 (PMC12303570; doi:10.7554/eLife.101583)
Supplement: Figure 3—source data 1. [file elife-101583-fig3-data1.xlsx]

## Sheet: Figure 3c
ID	preTils	postTils
1	10	15
2	7	10
3	20	30
4	25	80
5	5	10
6	5	20
7	10	30
8	5	1
9	10	13
10	10	20
