# Supplementary material for: Efficacy and safety of neoadjuvant stereotactic body radiation therapy plus dalpiciclib and exemestane for hormone receptor-positive, HER2-negative breast cancer: A prospective pilot study
Source: eLife. 2025 Jul 28;14:RP101583. doi: 10.7554/eLife.101583 (PMC12303570; doi:10.7554/eLife.101583)
Supplement: Figure 3—source data 2. [file elife-101583-fig3-data2.xlsx]

## Sheet: Figure 3d
ID	preIC	postIC
1	5	0
2	5	10
3	10	50
4	40	50
5	0	0
6	40	5
7	0	0
8	0	5
9	0	0
10	0	5
