# Supplementary material for: Efficacy and safety of neoadjuvant stereotactic body radiation therapy plus dalpiciclib and exemestane for hormone receptor-positive, HER2-negative breast cancer: A prospective pilot study
Source: eLife. 2025 Jul 28;14:RP101583. doi: 10.7554/eLife.101583 (PMC12303570; doi:10.7554/eLife.101583)
Supplement: Figure 3—source data 3. [file elife-101583-fig3-data3.xlsx]

## Sheet: Figure 3e
ID	preTC	postTC
1	0	0
2	3	1
3	0	30
4	10	5
5	0	0
6	5	1
7	0	0
8	1	0
9	0	1
10	1	5
